# Supplementary material for: First-Principles-Based Optimized Design of Fluoride Electrolytes for Sodium-Ion Batteries
Source: MDPI journal article supplement (doi:10.3390/molecules27206949), 2022-10-17
Supplement: s1 [file s1]

## Supplementary Materials

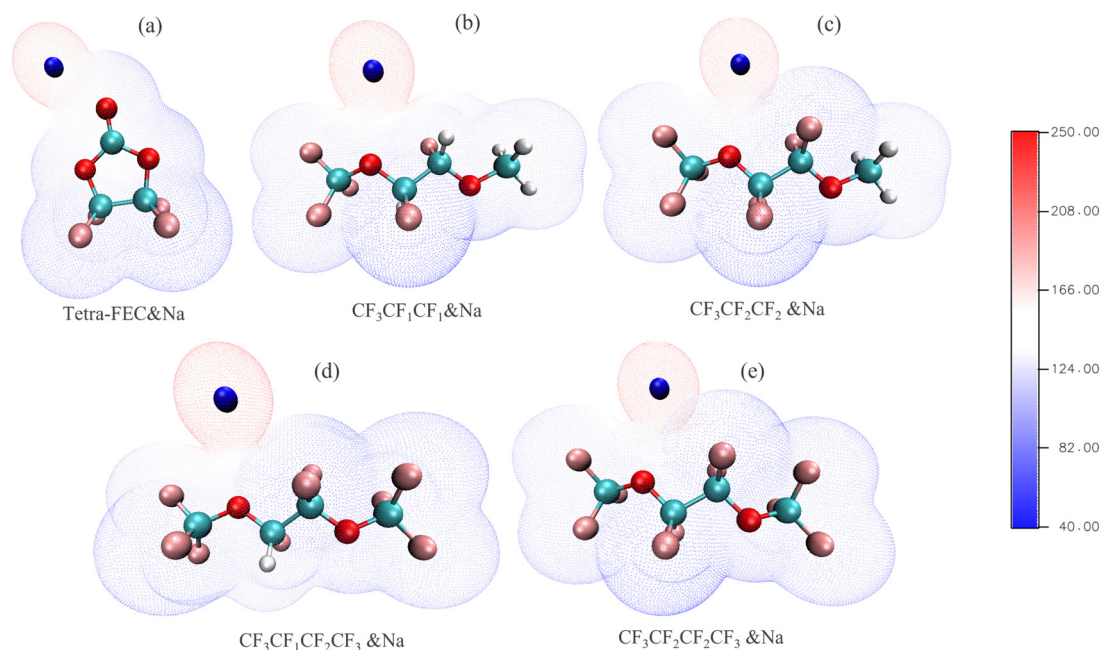

**FigureS1.** The electrostatic potential mapping of [Na<sup>+</sup>-solvent] complex of Tetra-FEC&Na(a), CF<sub>3</sub>CF<sub>1</sub>CF<sub>1</sub>&Na(b), CF<sub>3</sub>CF<sub>2</sub>CF<sub>2</sub>&Na(c), CF<sub>3</sub>CF<sub>1</sub>CF<sub>2</sub>CF<sub>3</sub>&Na(d), CF<sub>3</sub>CF<sub>2</sub>CF<sub>2</sub>CF<sub>3</sub>&Na(e)

**Table S1.** Cartesian Coordinates of [Na<sup>+</sup>-Tetra-FEC]

| Center Number | Atomic Name | Coordinates (Angstroms) |        |        |
|---------------|-------------|-------------------------|--------|--------|
|               |             | x                       | y      | z      |
| 1             | O           | -0.514                  | 0.809  | 0      |
| 2             | O           | 0.105                   | -1.343 | 0      |
| 3             | O           | -2.083                  | -0.812 | 0      |
| 4             | C           | 0.878                   | 0.862  | 0      |
| 5             | C           | 1.312                   | -0.649 | 0      |
| 6             | C           | -0.946                  | -0.481 | 0      |
| 7             | F           | 1.306                   | 1.511  | 1.083  |
| 8             | F           | 1.306                   | 1.511  | -1.083 |
| 9             | F           | 2.019                   | -0.971 | -1.083 |
| 10            | F           | 2.019                   | -0.971 | 1.083  |
| 11            | Na          | -4.307                  | 0.242  | 0      |

**Table S2.** Cartesian Coordinates of [Na<sup>+</sup>-CF<sub>3</sub>CF<sub>1</sub>CF<sub>1</sub>-]

| Center Number | Atomic Name | Coordinates (Angstroms) |        |        |
|---------------|-------------|-------------------------|--------|--------|
|               |             | x                       | y      | z      |
| 1             | C           | 1.964                   | -0.39  | 0.178  |
| 2             | O           | 0.758                   | 0.077  | -0.232 |
| 3             | C           | -0.349                  | -0.794 | -0.15  |
| 4             | C           | -1.599                  | 0.068  | 0.017  |
| 5             | O           | -2.66                   | -0.766 | 0.157  |
| 6             | C           | -3.95                   | -0.137 | 0.024  |
| 7             | F           | 2.855                   | 0.583  | -0.001 |
| 8             | F           | 1.959                   | -0.734 | 1.479  |
| 9             | F           | 2.363                   | -1.471 | -0.516 |
| 10            | H           | -0.242                  | -1.512 | 0.662  |
| 11            | F           | -0.451                  | -1.484 | -1.338 |
| 12            | H           | -1.708                  | 0.781  | -0.807 |
| 13            | F           | -1.411                  | 0.84   | 1.183  |
| 14            | H           | -4.681                  | -0.94  | 0.045  |
| 15            | H           | -4.126                  | 0.549  | 0.854  |
| 16            | H           | -4.011                  | 0.398  | -0.927 |
| 17            | Na          | 0.524                   | 3.105  | -0.628 |

**Table S3.** Cartesian Coordinates of [Na<sup>+</sup>-CF<sub>3</sub>CF<sub>2</sub>CF<sub>2</sub>-]

| Center Number | Atomic Name | Coordinates (Angstroms) |        |        |
|---------------|-------------|-------------------------|--------|--------|
|               |             | x                       | y      | z      |
| 1             | C           | 2.14                    | -0.304 | 0.046  |
| 2             | O           | 0.849                   | 0.104  | -0.199 |
| 3             | C           | -0.21                   | -0.784 | -0.131 |
| 4             | C           | -1.516                  | 0.054  | -0.005 |
| 5             | O           | -2.551                  | -0.777 | 0.041  |
| 6             | C           | -3.871                  | -0.176 | 0.178  |
| 7             | F           | 2.933                   | 0.662  | -0.408 |
| 8             | F           | 2.366                   | -0.463 | 1.354  |
| 9             | F           | 2.442                   | -1.45  | -0.573 |
| 10            | F           | -0.097                  | -1.615 | 0.924  |
| 11            | F           | -0.264                  | -1.545 | -1.243 |
| 12            | F           | -1.574                  | 0.925  | -1.062 |
| 13            | F           | -1.412                  | 0.844  | 1.11   |
| 14            | H           | -4.56                   | -1.015 | 0.173  |
| 15            | H           | -3.934                  | 0.364  | 1.121  |
| 16            | H           | -4.067                  | 0.484  | -0.666 |
| 17            | Na          | 0.67                    | 3.326  | -0.073 |

**Table S4.** Cartesian Coordinates of [Na<sup>+</sup>- CF<sub>3</sub>CF<sub>1</sub>CF<sub>2</sub>CF<sub>3</sub>]

| Center<br>Number | Atomic<br>Name | Coordinates (Angstroms) |        |        |
|------------------|----------------|-------------------------|--------|--------|
|                  |                | x                       | y      | z      |
| 1                | C              | 3.075                   | -0.166 | 0.119  |
| 2                | O              | 1.81                    | -0.674 | 0.31   |
| 3                | C              | 0.687                   | 0.095  | 0.07   |
| 4                | C              | -0.504                  | -0.878 | -0.032 |
| 5                | O              | -1.629                  | -0.098 | -0.318 |
| 6                | C              | -2.833                  | -0.526 | 0.162  |
| 7                | F              | 3.911                   | -0.976 | 0.757  |
| 8                | F              | 3.403                   | -0.146 | -1.177 |
| 9                | F              | 3.207                   | 1.074  | 0.602  |
| 10               | F              | 0.811                   | 0.828  | -1.056 |
| 11               | F              | 0.472                   | 0.957  | 1.088  |
| 12               | H              | -0.606                  | -1.448 | 0.891  |
| 13               | F              | -0.273                  | -1.739 | -1.069 |
| 14               | F              | -3.761                  | 0.307  | -0.293 |
| 15               | F              | -3.125                  | -1.771 | -0.242 |
| 16               | F              | -2.863                  | -0.521 | 1.505  |
| 17               | Na             | -1.766                  | 3.124  | -0.343 |

**Table S5.** Cartesian Coordinates of [Na<sup>+</sup>- CF<sub>3</sub>CF<sub>2</sub>CF<sub>2</sub>CF<sub>3</sub>]

| Center<br>Number | Atomic<br>Name | Coordinates (Angstroms) |        |        |
|------------------|----------------|-------------------------|--------|--------|
|                  |                | x                       | y      | z      |
| 1                | C              | 2.843                   | -0.409 | 0.108  |
| 2                | O              | 1.595                   | 0.066  | -0.247 |
| 3                | C              | 0.485                   | -0.749 | -0.209 |
| 4                | C              | -0.76                   | 0.193  | -0.195 |
| 5                | O              | -1.868                  | -0.62  | -0.259 |
| 6                | C              | -3.115                  | -0.147 | 0.103  |
| 7                | F              | 3.724                   | 0.464  | -0.361 |
| 8                | F              | 2.973                   | -0.483 | 1.435  |
| 9                | F              | 3.091                   | -1.615 | -0.409 |
| 10               | F              | 0.464                   | -1.531 | 0.884  |
| 11               | F              | 0.432                   | -1.548 | -1.29  |
| 12               | F              | -0.704                  | 1.028  | -1.251 |
| 13               | F              | -0.739                  | 0.942  | 0.922  |
| 14               | F              | -4                      | -1.006 | -0.382 |
| 15               | F              | -3.247                  | -0.092 | 1.431  |
| 16               | F              | -3.358                  | 1.07   | -0.393 |
| 17               | Na             | 1.612                   | 3.277  | -0.006 |
